# Supplementary figures and images for: Asymmetric synthesis of vinylogous β-amino acids and their incorporation into mixed backbone oligomers
Source: Royal Society of Chemistry journal article supplement (doi:10.1039/c7ob00333a), 2017-01-01

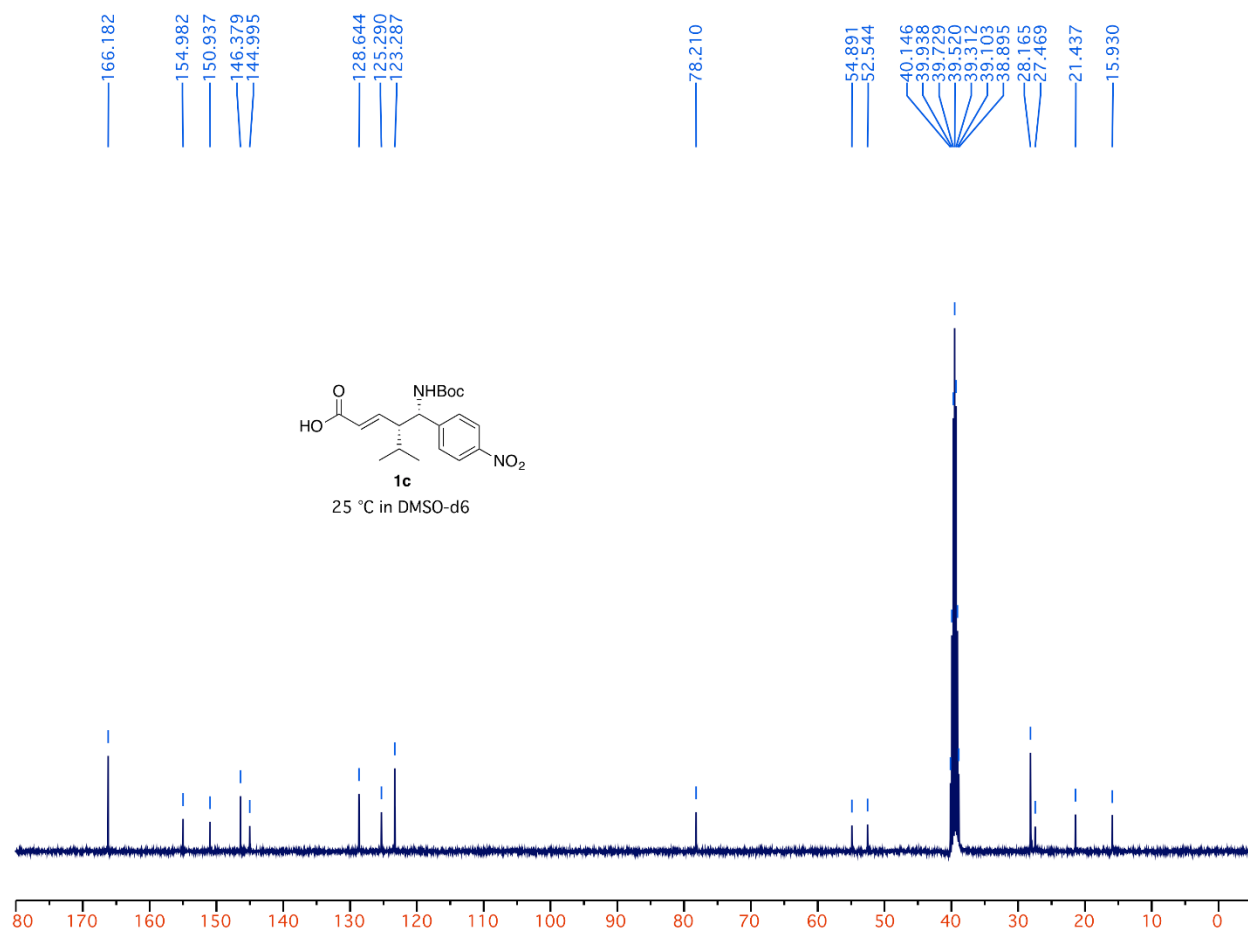

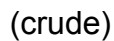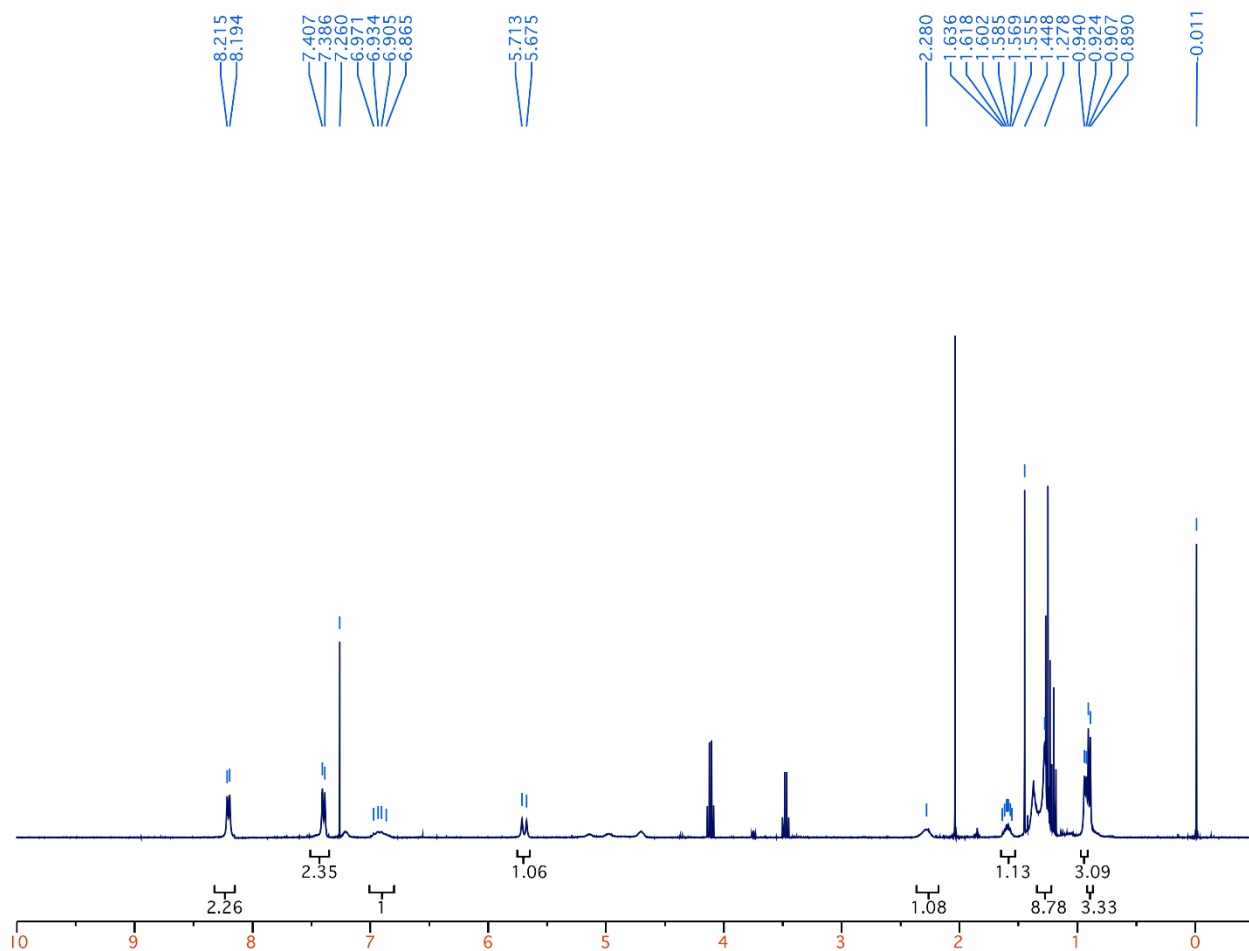

# 1d after purification

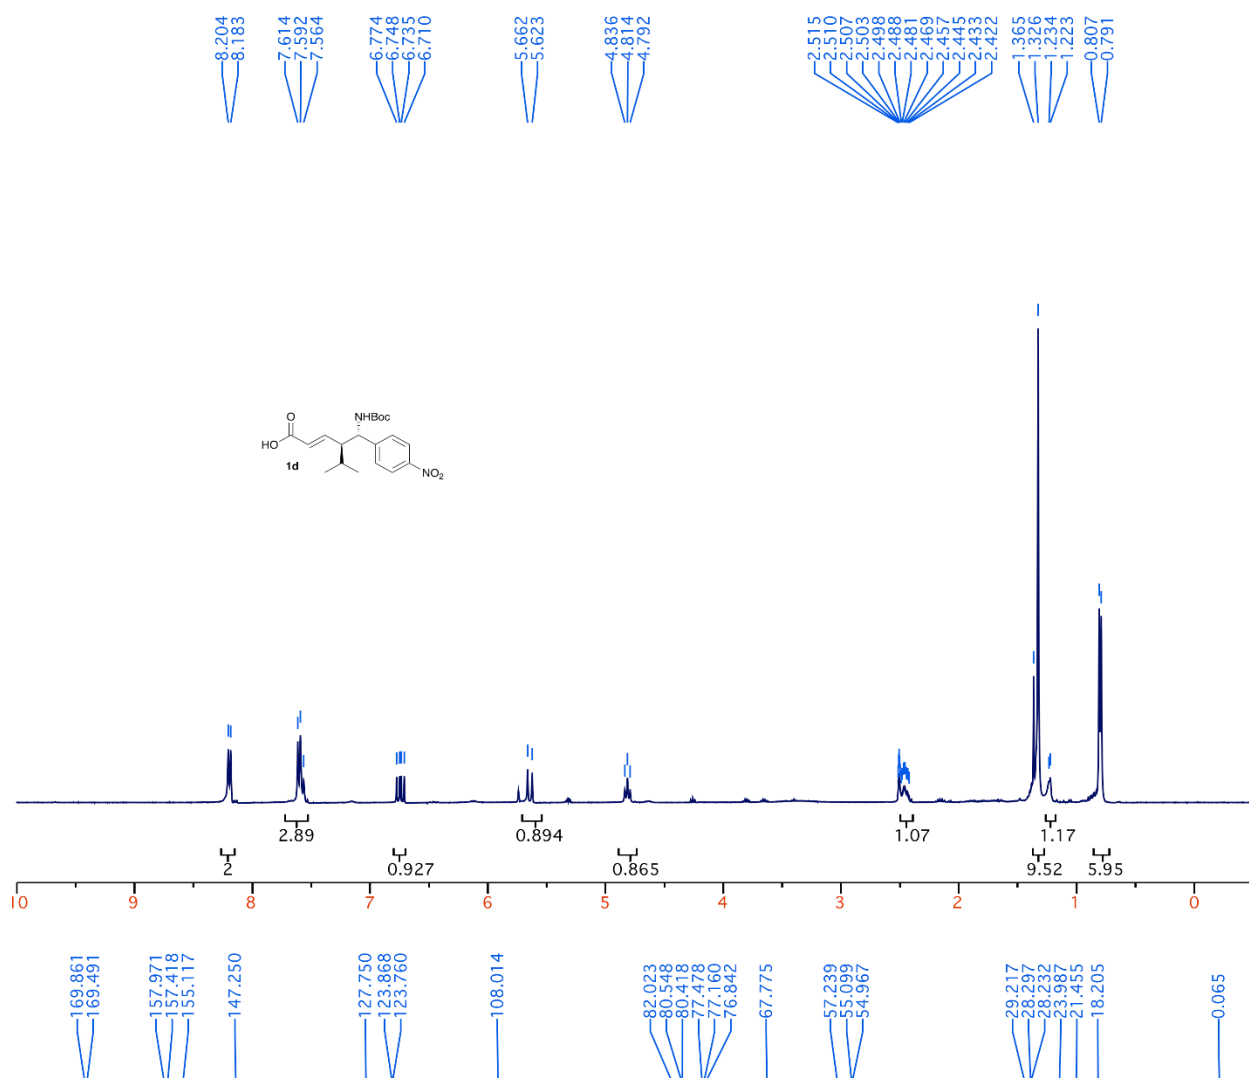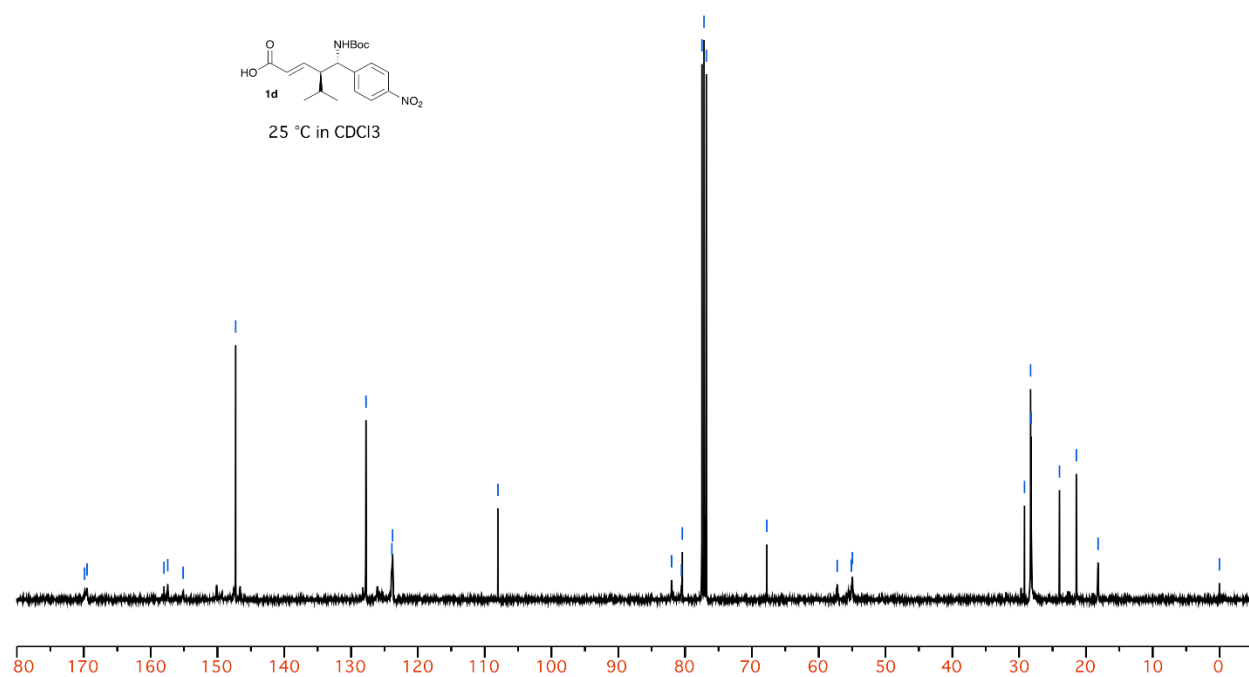

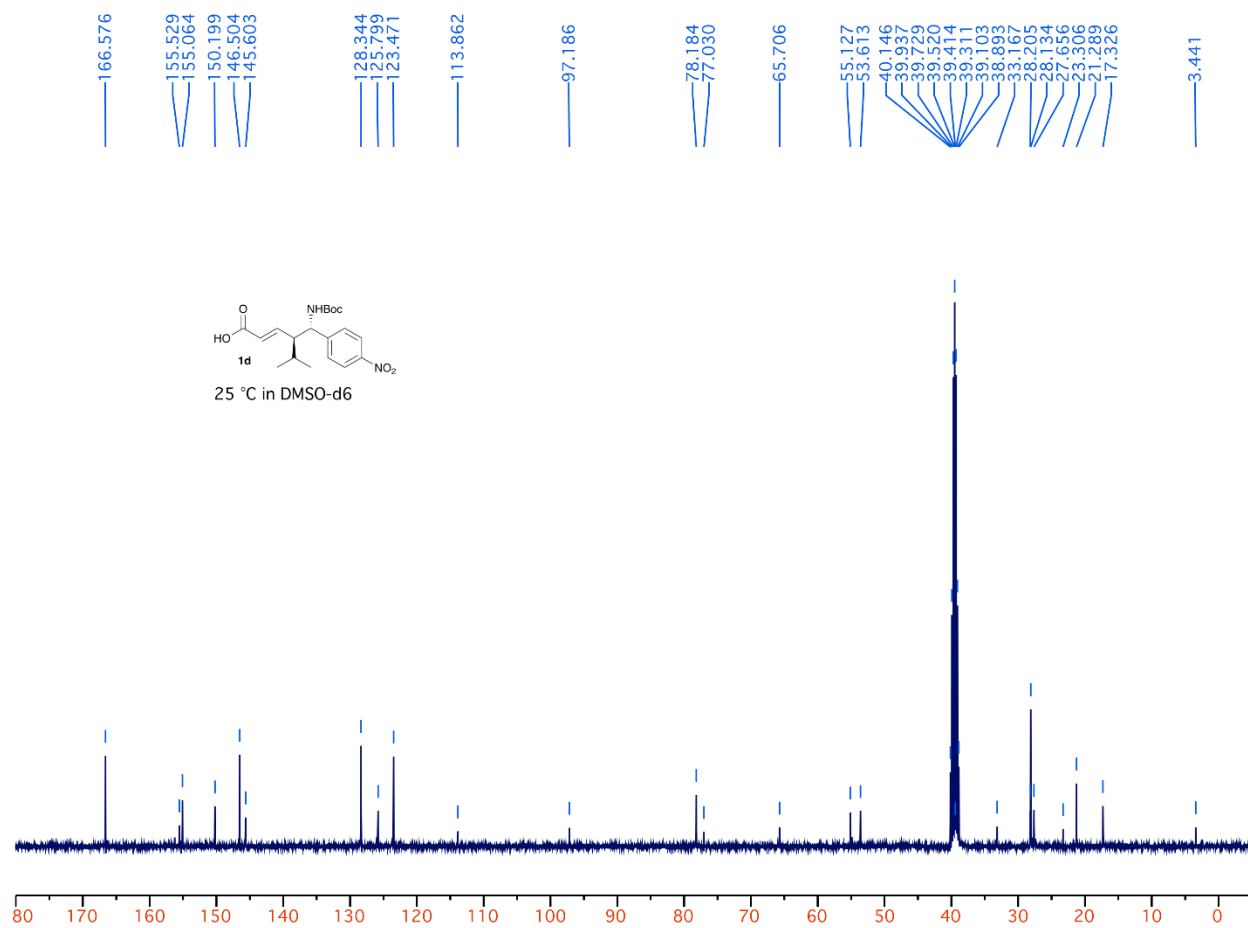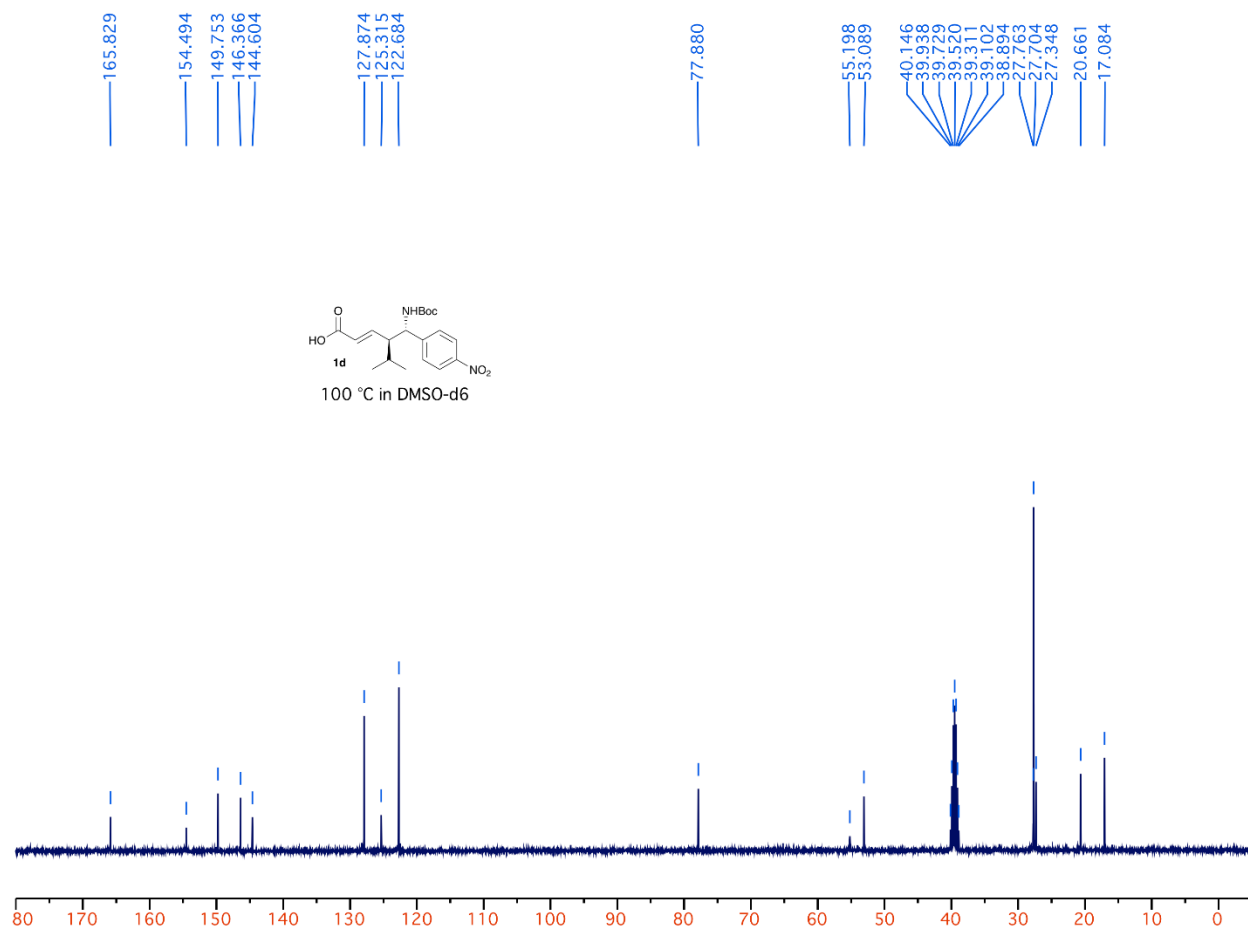

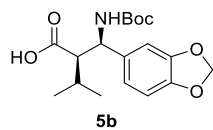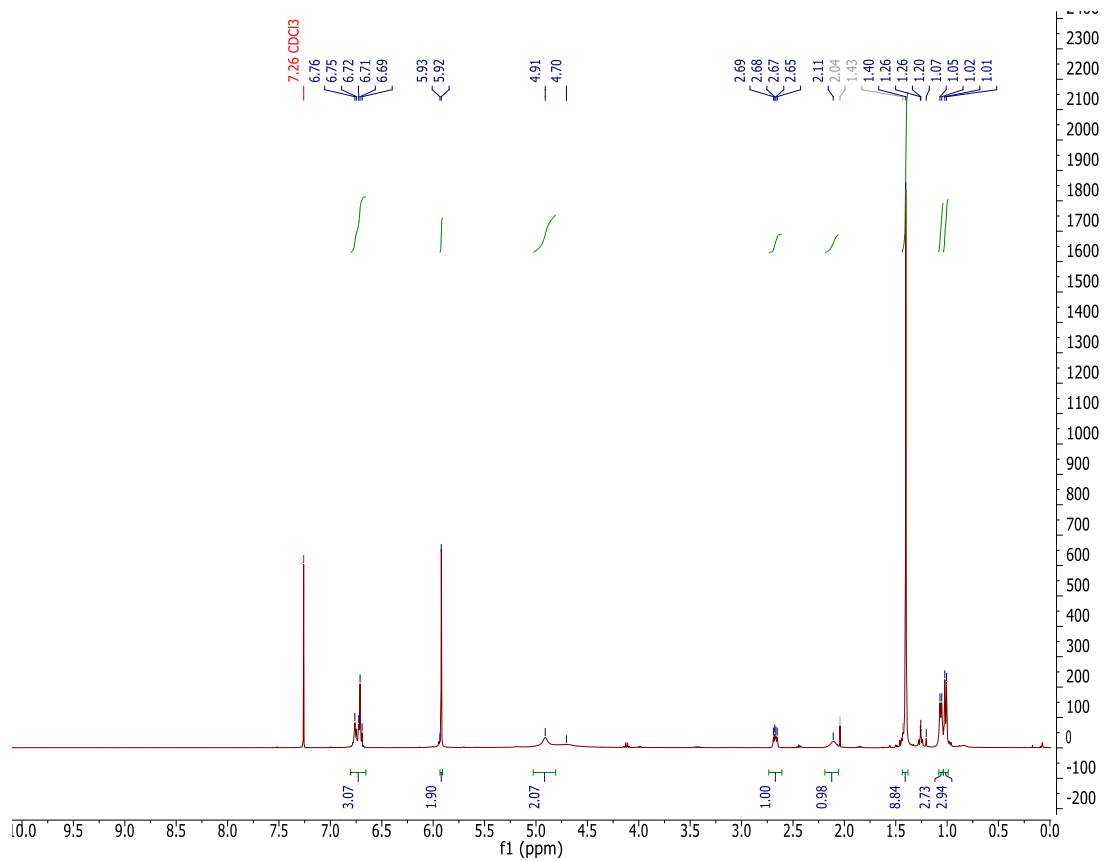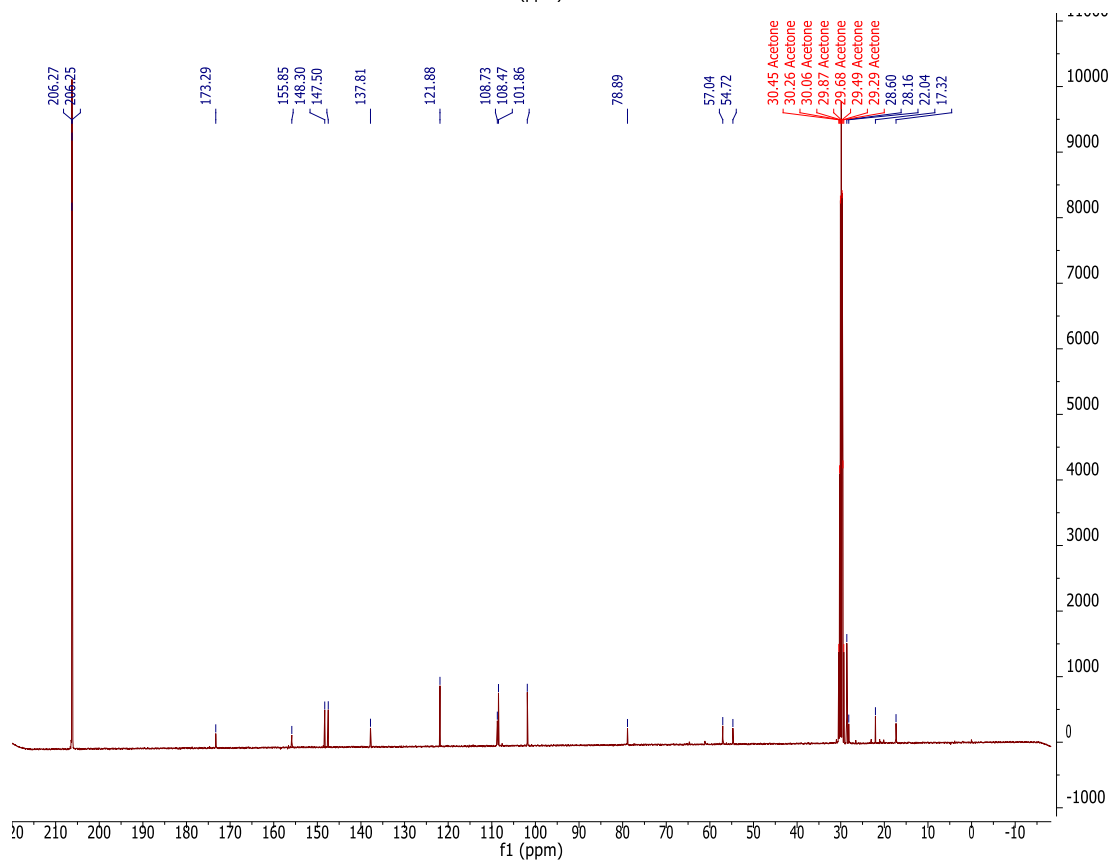

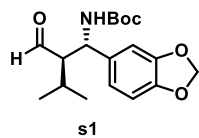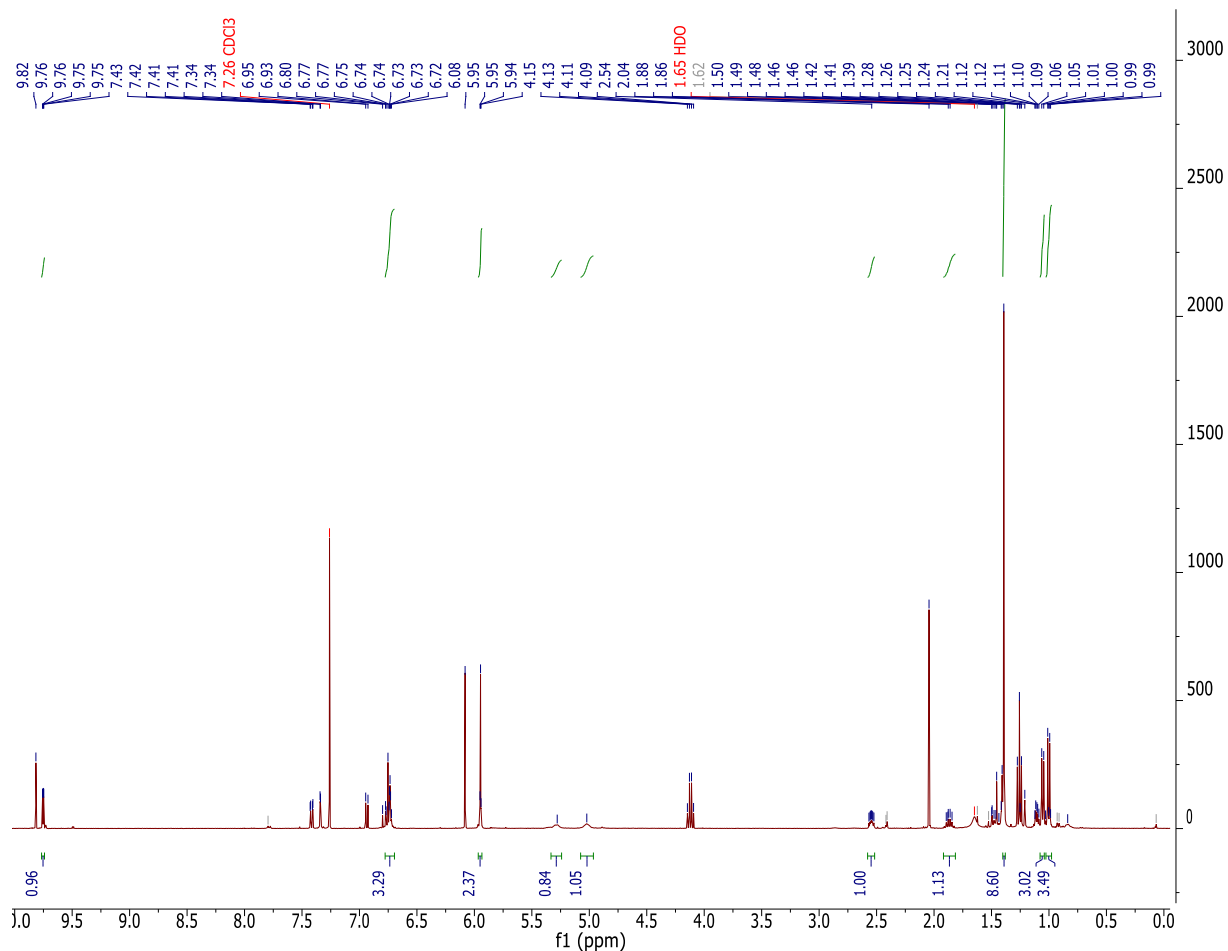

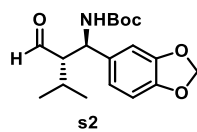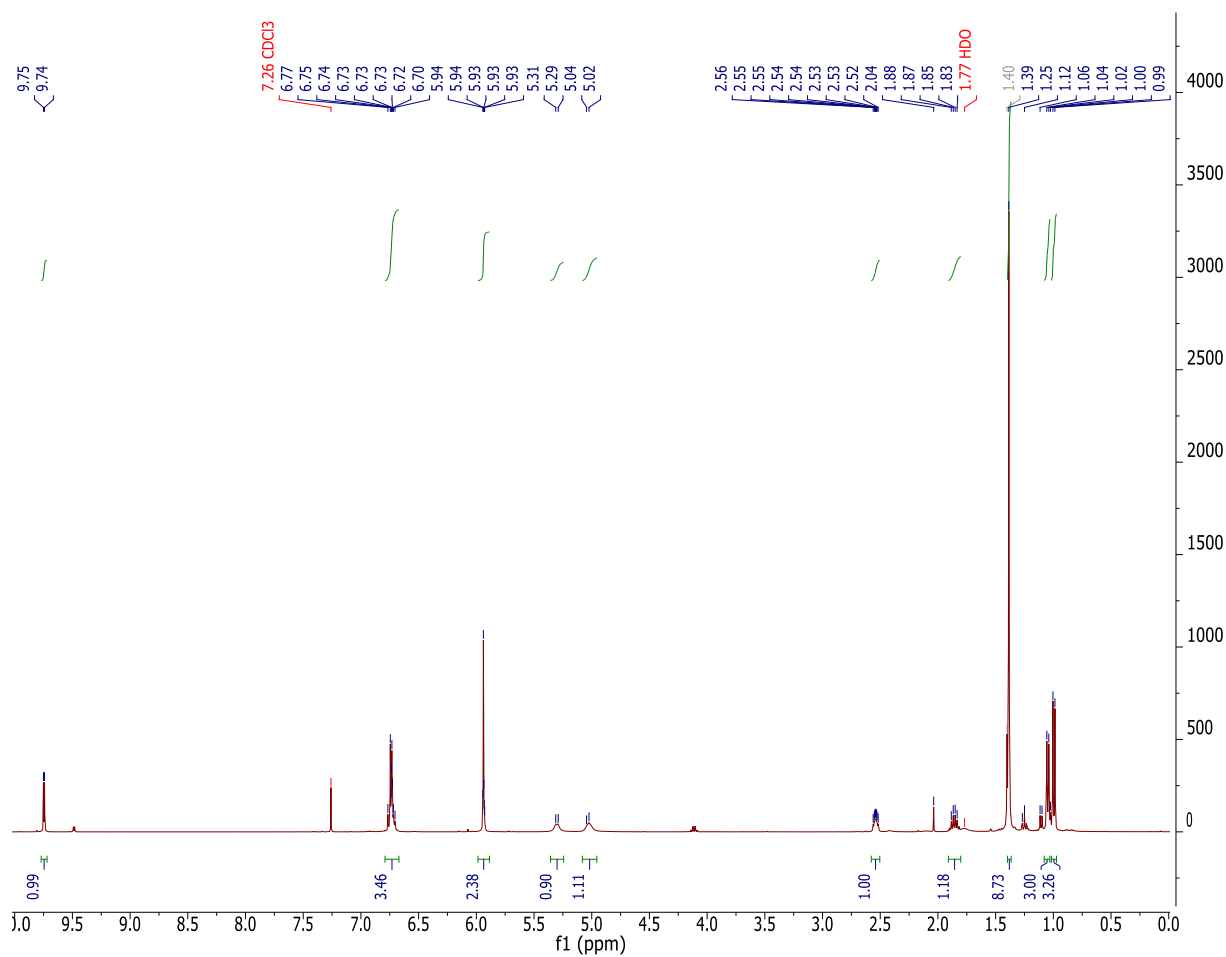

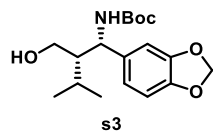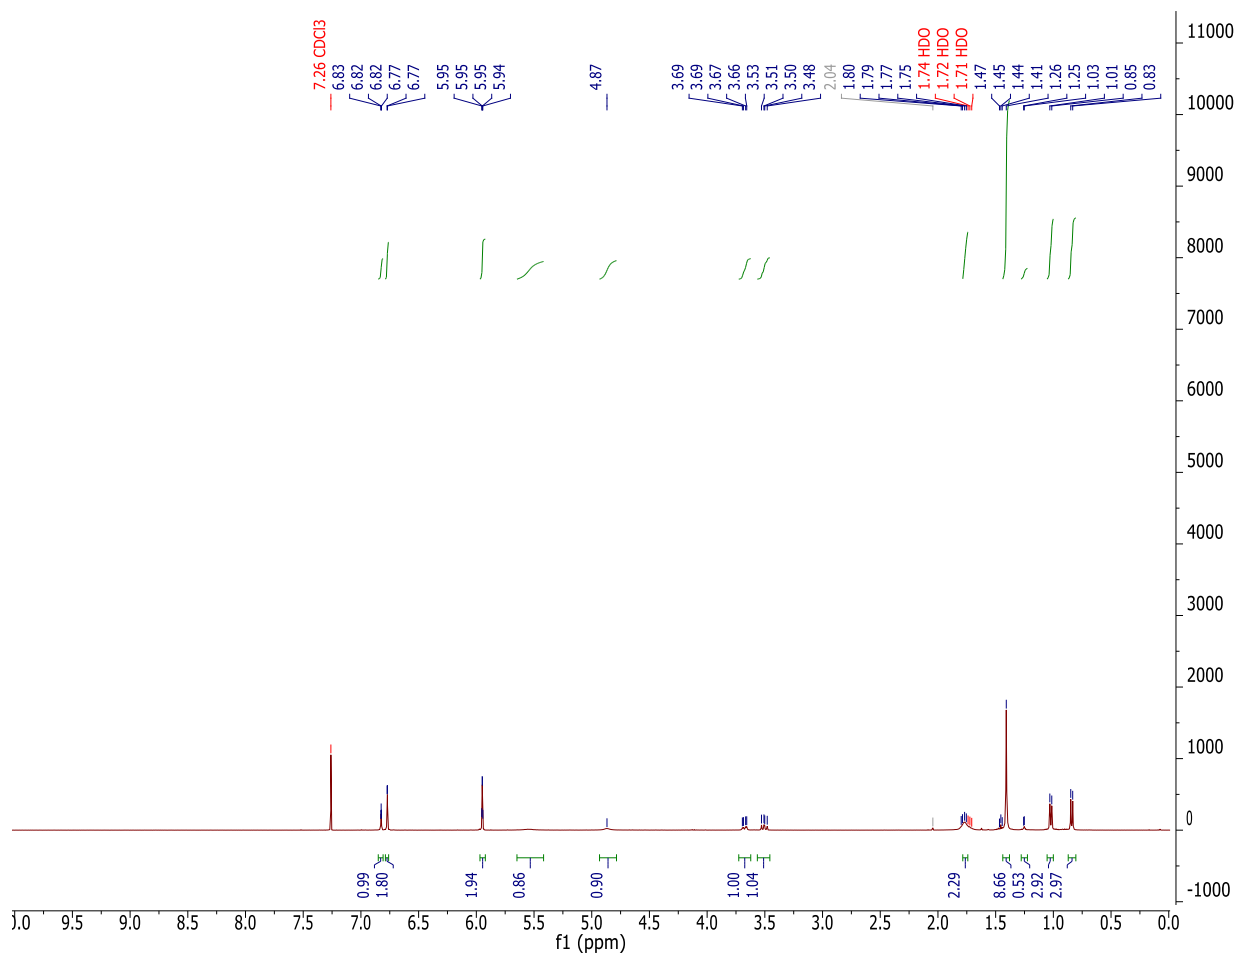

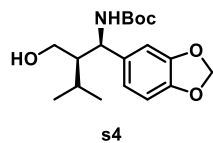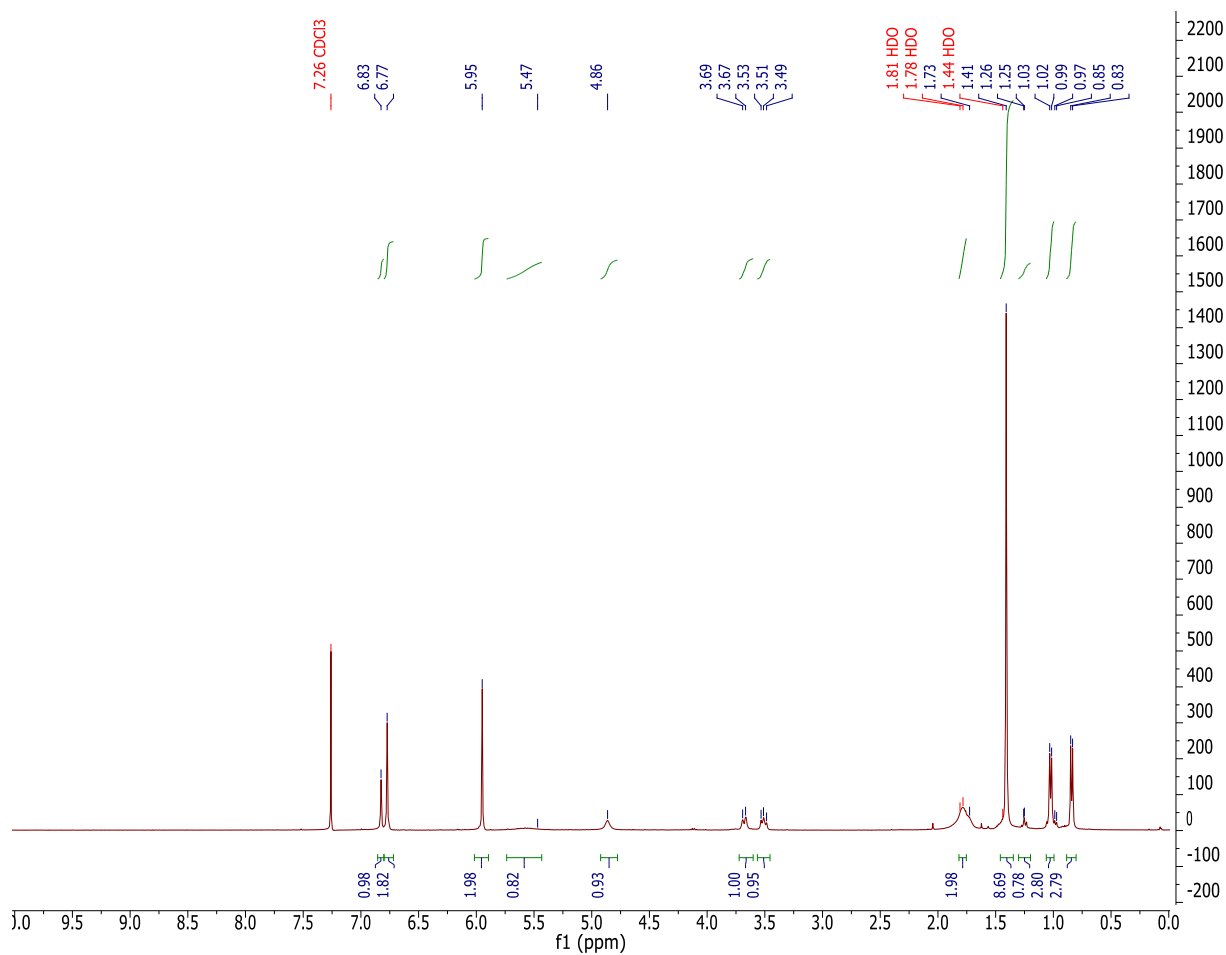

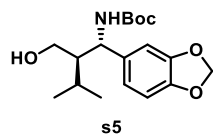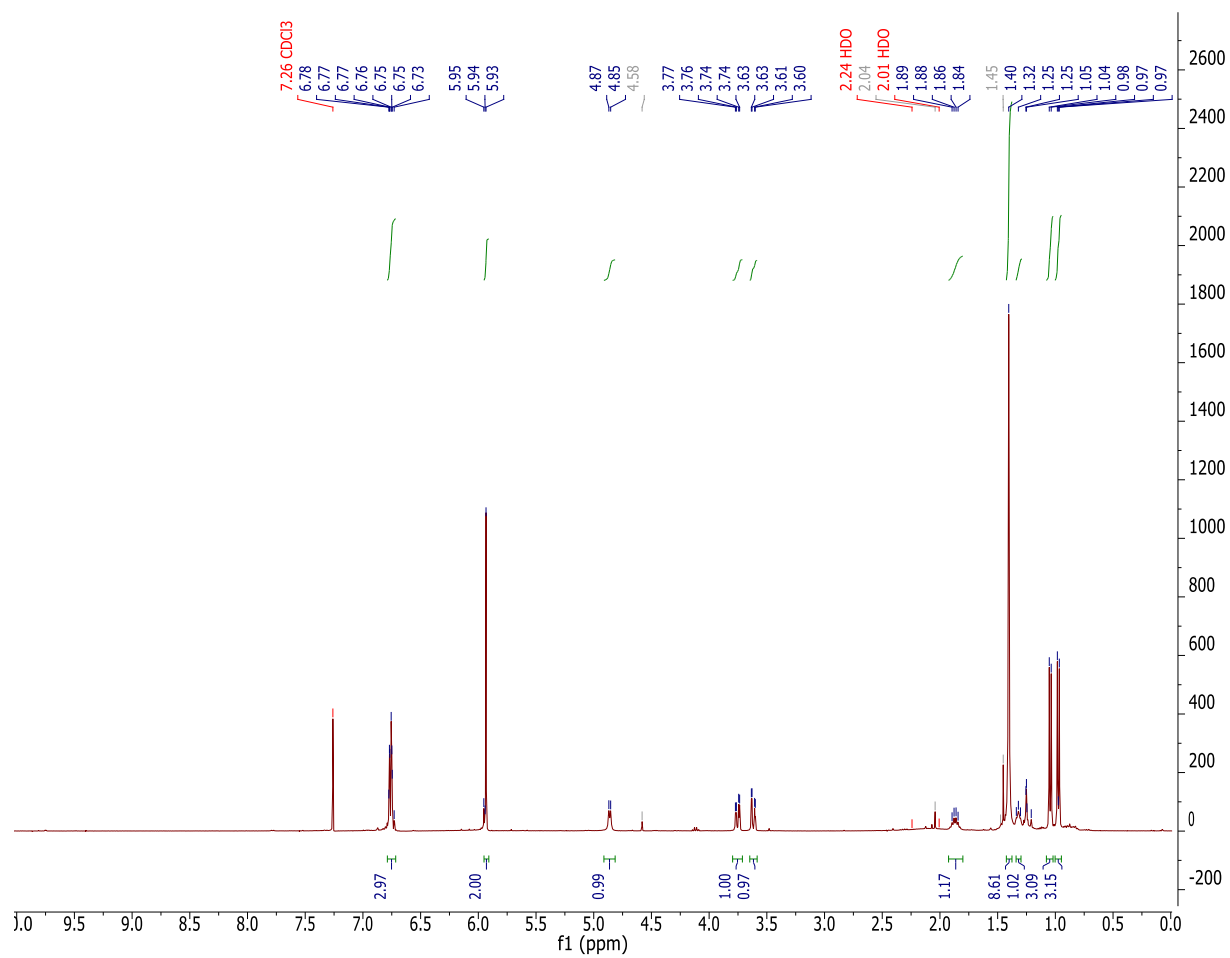

Supplement: c7ob00333a3.pdf [file c7ob00333a3.pdf]
